# Supplementary material for: Prevalence of Human Papillomavirus Genotypes among African Women with Normal Cervical Cytology and Neoplasia: A Systematic Review and Meta-Analysis
Source: PubMed Central journal article supplement (PMC4396854; doi:10.1371/journal.pone.0122488), 2015-04-14
Supplement: pone.0122488.s002.pdf [file pone.0122488.s002.pdf]

## PROSPERO International prospective register of systematic reviews

### Human papillomavirus genotype prevalence among African women with normal cervical cytologies and lesions: a systematic review and meta-analysis

*Javier Ogembo, Paul Bain, Alaina Seymour, Henry Park*

#### Citation

Javier Ogembo, Paul Bain, Alaina Seymour, Henry Park. Human papillomavirus genotype prevalence among African women with normal cervical cytologies and lesions: a systematic review and meta-analysis. PROSPERO 2013:CRD42013006558 Available from [http://www.crd.york.ac.uk/PROSPERO/display\\_record.asp?ID=CRD42013006558](http://www.crd.york.ac.uk/PROSPERO/display_record.asp?ID=CRD42013006558)

#### Review question(s)

What HPV genotypes are predominant in African women with normal and different cervical lesions?  
What HPV genotypes are predominant in HIV positive African women with normal and different cervical lesions?

#### Searches

PubMed/MEDLINE (NCBI), Embase (Elsevier), Web of Science (Thomson), BIOSIS Preview (Thomson), Dissertations and Theses (ProQuest), Cochrane Central Register of Controlled Trials (Wiley), African Index Medicus (WHO), and POPLINE (K4Health). We also attempted to identify unpublished studies by examining ClinicalTrials.gov (NIH), International Clinical Trial Registry Platform (WHO), European Union Clinical Trials Register (EMA), and System for Information on Grey Literature in Europe (OpenGrey).

#### Types of study to be included

Observational studies or control arms of randomized controlled trials with individual level data will be assessed by a checklist of essential items as outlined in STROBE by three reviewers.

#### Condition or domain being studied

Human papillomavirus, the causal organism of cervical cancer in adult women.

#### Participants/ population

All African adult women screened for different HPV genotypes.

#### Intervention(s), exposure(s)

A comprehensive strategy was used to identify studies where the physical document and relevant data were accessible, studies including women living in African countries. The study should have included at least 10 women from sub-Saharan Africa, cervical cytology/histology was confirmed by fixed/fresh biopsy or exfoliated cervical cells, the study included HPV genotype-specific prevalence on at least types 16, 18, and one other genotype, and genotype prevalence was stratified by cervical histology/grade.

#### Comparator(s)/ control

Comparisons will be made within the groups e.g. African regions as per WHO classification, country, type of lesions, tissue biopsies, methods of genotyping.

#### Context

Studies must have included adult women living in the African continent.

#### Outcome(s)

##### Primary outcomes

Determine the prevalence of HPV genotypes in African women with normal and cervical cytologies. This will help inform whether the existing two prophylactic vaccines currently used in developed countries will have the same impact in the continent.

Open.

##### Secondary outcomes

Will help inform whether the existing two prophylactic vaccines currently used in developed countries will have the same impact in the continent.

Open.

**Data extraction, (selection and coding)**

Three separate reviewers (R.K.O, A.J.S. and J.G.O.) read the titles and abstracts to determine each study's eligibility using the following pre-specified criteria for inclusion: the physical document and relevant data were accessible. Discrepancies were resolved by consensus.

**Risk of bias (quality) assessment**

Funnel plots will be used to assess the risk of bias of cross-sectional studies.

**Strategy for data synthesis**

Data will be grouped based on country where the study was conducted, geographical region as outlined by WHO, type of biopsies analyzed, methods of screening HPV genotypes.

**Analysis of subgroups or subsets**

High risk vs Low risk HPV genotypes

**Dissemination plans**

Publication in peer-reviewed journal

**Contact details for further information**

Javier Ogembo  
364 Plantation Street, LRB Room 211  
Worcester, MA 01605  
Phone: 508-856-3380  
javier.ogembo@umassmed.edu

**Organisational affiliation of the review**

University of Massachusetts Medical School  
www.umassmed.edu

**Review team**

Dr Javier Ogembo, University of Massachusetts Medical School  
Paul Bain, Countway Library of Harvard Medical School  
Alaina Seymour, Northeastern University  
Henry Park, Yale University

**Anticipated or actual start date**

01 October 2013

**Anticipated completion date**

30 January 2014

**Funding sources/sponsors**

None

**Conflicts of interest**

None known

**Language**

English

**Country**

United States of America

**Subject index terms status**

Subject indexing assigned by CRD

**Subject index terms**

Africa; Alphapapillomavirus; Genotype; Humans; Papillomavirus Infections; Prevalence;

**Stage of review**

Ongoing

**Date of registration in PROSPERO**

29 November 2013

**Date of publication of this revision**

29 November 2013

**Stage of review at time of this submission**

Started

Completed

|                                                                 |     |    |
|-----------------------------------------------------------------|-----|----|
| Preliminary searches                                            | Yes | No |
| Piloting of the study selection process                         | Yes | No |
| Formal screening of search results against eligibility criteria | No  | No |
| Data extraction                                                 | No  | No |
| Risk of bias (quality) assessment                               | No  | No |
| Data analysis                                                   | No  | No |

---

PROSPERO

This information has been provided by the named contact for this review. CRD has accepted this information in good faith and registered the review in PROSPERO. CRD bears no responsibility or liability for the content of this registration record, any associated files or external websites.

---
