# Supplementary material for: Prevalence of Human Papillomavirus Genotypes among African Women with Normal Cervical Cytology and Neoplasia: A Systematic Review and Meta-Analysis
Source: PubMed Central journal article supplement (PMC4396854; doi:10.1371/journal.pone.0122488), 2015-04-14
Supplement: pone.0122488.s006.pdf [file pone.0122488.s006.pdf]

| Country (S)<br>N [%]<br>{Region}<br>GNI                                         | Study                  | HIV (Y/N) | Design | Median Age | Age range | Pathology | Primer   | HPV genotyping location | Cervical Lesion/Norm | N   | Any  | HPV-specific prevalence (% of all cases tested) |      |      |      |      |      |      |      |      |      |     |      |      |      |      | Other | Multi |      |      |      |
|---------------------------------------------------------------------------------|------------------------|-----------|--------|------------|-----------|-----------|----------|-------------------------|----------------------|-----|------|-------------------------------------------------|------|------|------|------|------|------|------|------|------|-----|------|------|------|------|-------|-------|------|------|------|
|                                                                                 |                        |           |        |            |           |           |          |                         |                      |     |      | 16                                              | 18   | 31   | 33   | 35   | 39   | 45   | 51   | 52   | 53   | 56  | 58   | 59   | 66   | 68   |       |       | 6    | 11   |      |
| <b>Algeria (3)</b><br>1087 [4.1]<br>{Northern Africa}<br>Upper Middle Income    | Bosch 1995a            | N         | C-S    | 34         | .         | H         | PGMY9/11 | USA                     | ICC                  | 12  | 75   | 33.3                                            | 41.7 | 0    | .    | .    | 0    | 0    | .    | .    | .    | .   | .    | 0    | .    | .    | 0     | 0     | 0    | .    |      |
|                                                                                 | Hammouda 2005          | N         | C-C    | 52         | 30-88     | C         | GP5/6    | NLD                     | Norm                 | 145 | 12.4 | 7.6                                             | 2.1  | 1.4  | 0    | 0.7  | 0.7  | 0.7  | 0    | 0    | 0    | 0   | 0    | 0    | 0    | 0    | 0     | 0     | 0    | 2.8  | 4.8  |
|                                                                                 | Hammouda 2005          | N         | C-C    | 53         | 32-82     | C         | GP5/6    |                         | ICC                  | 171 | 97.7 | 57.9                                            | 14.6 | 2.3  | 4.7  | 4.1  | 2.3  | 6.4  | 1.8  | 0.6  | 0    | 1.8 | 0.6  | 1.2  | 0    | 0    | 0     | 0     | 1.8  | 9.4  |      |
|                                                                                 | Hammouda 2011          | N         | C-S    | 39.9       | 15-65     | C         | GP5/6    |                         | Norm                 | 732 | 5.3  | 0.5                                             | 0.3  | 1.1  | 0.1  | 0.1  | 0.1  | 0.3  | 0.4  | 0.1  | 0    | 0.1 | 0    | 0.1  | 0    | 0    | 0.5   | 0     | 1.6  | 1.1  |      |
|                                                                                 | Hammouda 2011          | N         | C-S    | 39.9       | 15-65     | H         | GP5/6    |                         | ASC+                 | 27  | 33.3 | 3.7                                             | 0    | 7.4  | 3.7  | 0    | 3.7  | 0    | 3.7  | 0    | 3.7  | 0   | 3.7  | 7.4  | 0    | 0    | 0     | 0     | 0    | 3.7  | 14.8 |
| <b>Benin (2)</b><br>360 [1.3]<br>{Western Africa}<br>Low Income                 | Bosch 1995b            | N         | C-S    | 34         | .         | H         | PGMY9/11 | USA                     | ICC                  | 6   | 83.3 | 50                                              | 16.7 | 0    | .    | .    | 0    | 0    | .    | .    | .    | .   | .    | 0    | .    | .    | 0     | 0     | 0    | .    |      |
|                                                                                 | Piras 2011             | N         | C-S    | .          | 15-70     | C         | GP5/6    | ITA                     | Norm                 | 258 | 26.7 | 4.3                                             | 3.1  | 0.8  | 0.8  | 4.7  | 0.4  | 1.6  | 1.2  | 0.4  | 0    | 2.3 | 3.1  | 8.5  | 0    | 0    | 2.3   | 8.3   | 4.7  | 9.3  |      |
|                                                                                 | Piras 2011             | N         | C-S    | .          | 15-70     | C         | GP5/6    |                         | ASC                  | 72  | 45.8 | 8.3                                             | 6.9  | 1.4  | 4.2  | 12.5 | 0    | 9.7  | 1.4  | 1.4  | 0    | 6.9 | 4.2  | 9.7  | 0    | 0    | 1.4   | 14.3  | 6.9  | 18.1 |      |
|                                                                                 | Piras 2011             | N         | C-S    | .          | 15-70     | C         | GP5/6    |                         | LSIL                 | 7   | 71.4 | 14.3                                            | 0    | 0    | 0    | 0    | 0    | 0    | 14.3 | 0    | 0    | 0   | 14.3 | 14.3 | 0    | 0    | 42.9  | 75    | 14.3 | 71.4 |      |
|                                                                                 | Piras 2011             | N         | C-S    | .          | 15-70     | C         | GP5/6    |                         | HSIL                 | 4   | 75   | 0                                               | 0    | 0    | 0    | 25   | 0    | 0    | 0    | 25   | 0    | 0   | 0    | 0    | 0    | 0    | 0     | 0     | 0    | 0    | 0    |
|                                                                                 | Piras 2011             | N         | C-S    | .          | 15-70     | C         | GP5/6    |                         | HSIL+                | 7   | 57.1 | 0                                               | 0    | 14.3 | 0    | 14.3 | 0    | 14.3 | 0    | 0    | 0    | 0   | 0    | 0    | 14.3 | 0    | 0     | 0     | 0    | 0    | 28.6 |
|                                                                                 | Piras 2011             | N         | C-S    | .          | 15-70     | C         | GP5/6    |                         | UNS                  | 6   | 83.3 | 16.7                                            | 33.3 | 16.7 | 16.7 | 0    | 0    | 0    | 0    | 0    | 0    | 0   | 0    | 0    | 0    | 0    | 0     | 0     | 0    | 0    | 33.3 |
| <b>Botswana (2)</b><br>227 [0.9]<br>{Southern Africa}<br>Upper Middle Income    | MacLeod 2011           | Y         | C-S    | 32         | 29-39     | C         | PGMY9/11 | USA                     | Norm                 | 40  | 50   | 12.5                                            | 5    | 0    | 2.5  | 5    | 7.5  | 2.5  | 2.5  | 5    | 12.5 | 2.5 | 12.5 | 15   | 0    | 5    | 0     | 0     | 17.5 | 30   |      |
|                                                                                 | MacLeod 2011           | Y         | C-S    | 32         | 29-39     | C         | PGMY9/11 |                         | ASC                  | 12  | 75   | 0                                               | 16.7 | 8.3  | 8.3  | 0    | 8.3  | 8.3  | 0    | 8.3  | 0    | 0   | 25   | 0    | 8.3  | 0    | 0     | 3.7   | 16.7 | 50   |      |
|                                                                                 | MacLeod 2011           | Y         | C-S    | 32         | 29-39     | C         | PGMY9/11 |                         | LSIL                 | 54  | 74.1 | 13                                              | 9.3  | 3.7  | 0    | 5.6  | 14.8 | 9.3  | 7.4  | 9.3  | 11.1 | 1.9 | 18.5 | 13   | 18.5 | 1.9  | 1.9   | 4.8   | 48.1 | 53.7 |      |
|                                                                                 | MacLeod 2011           | Y         | C-S    | 32         | 29-39     | C         | PGMY9/11 | ZFA                     | HSIL                 | 21  | 71.4 | 23.8                                            | 23.8 | 0    | 4.8  | 14.3 | 23.8 | 14.3 | 0    | 23.8 | 4.8  | 0   | 23.8 | 14.3 | 9.5  | 14.3 | 0     | 0     | 38.1 | 57.1 |      |
|                                                                                 | Ramogola-Masire 2011   | Y         | C-S    | 36         | >21       | H         | PGMY9/11 | USA                     | HSIL                 | 100 | 96   | 45                                              | 27   | 14   | 18   | 40   | 3    | 13   | 15   | 9    | 16   | 10  | 35   | 8    | 20   | 12   | 8     | 0.6   | 210  | 82   |      |
| <b>Cote d'Ivoire (3)</b><br>1192 [4.5]<br>{Western Africa}<br>Low Middle Income | Adjorlolo-Johnson 2010 | Y/N       | C-C    | 46.7       | 24-69     | C         | PGMY9/11 |                         | ICC                  | 132 | 89.4 | 44.7                                            | 21.2 | 3    | .    | 8.3  | .    | 9.8  | .    | .    | .    | .   | .    | .    | .    | .    | .     | .     | 0    | .    |      |
|                                                                                 | Jaquet 2012            | Y         | C-S    | .          | 25-65     | C         | PGMY9/11 | FRA                     | Norm                 | 445 | 62.9 | 12.4                                            | 9.2  | 4.3  | 2.7  | 13.3 | 3.4  | 5.4  | 5.6  | 4.7  | 8.1  | 3.1 | 8.3  | 6.7  | 1.8  | 1.8  | 5.2   | 0.3   | 64.5 | 12.8 |      |
|                                                                                 | La Ruche 1998          | Y/N       | C-S    | 30         | 20-50     | C         | MY9/11   | FRA                     | Norm                 | 391 | 24.3 | 1.5                                             | 0.3  | 0.8  | 0    | 0.5  | 0.3  | 0.3  | 0    | 0.3  | 0    | 0   | 1    | 0.3  | 0    | 0.8  | 0.5   | 0.7   | 1.5  | 2.3  |      |
|                                                                                 | La Ruche 1998          | Y/N       | C-S    | 27.9       | 20-50     | C         | MY9/11   |                         | LSIL                 | 151 | 68.2 | 10.6                                            | 6    | 5.3  | 5.3  | 1.3  | 2    | 2    | 0    | 2.6  | 0    | 2.6 | 3.3  | 1.3  | 0    | 2.6  | 3.3   | 1.7   | 14.6 | 23.2 |      |
|                                                                                 | La Ruche 1998          | Y/N       | C-S    | 30         | 20-50     | C         | MY9/11   |                         | HSIL                 | 60  | 81.7 | 25                                              | 8.3  | 5    | 6.7  | 0    | 0    | 0    | 0    | 3.3  | 0    | 3.3 | 6.7  | 0    | 0    | 1.7  | 0     | 0     | 15   | 23.3 |      |
|                                                                                 | La Ruche 1998          | Y/N       | C-S    | 41.8       | 20-50     | C         | MY9/11   |                         | ICC                  | 13  | 53.8 | 38.5                                            | 0    | 0    | 0    | 0    | 0    | 0    | 0    | 0    | 7.7  | 0   | 0    | 7.7  | 0    | 0    | 0     | 0     | 0    | 0    | 0    |

| Country (S)<br>N [%]<br>{Region}<br>GNI                                    | Study                | HIV (Y/N) | Design | Median Age | Age range | Pathology | Primer    | HPV genotyping location | Cervical Lesion/Norm | N   | Any  | HPV-specific prevalence (% of all cases tested) |      |      |      |     |     |      |     |      |     |     |      |     |      |     | Other | Multi |      |      |     |
|----------------------------------------------------------------------------|----------------------|-----------|--------|------------|-----------|-----------|-----------|-------------------------|----------------------|-----|------|-------------------------------------------------|------|------|------|-----|-----|------|-----|------|-----|-----|------|-----|------|-----|-------|-------|------|------|-----|
|                                                                            |                      |           |        |            |           |           |           |                         |                      |     |      | 16                                              | 18   | 31   | 33   | 35  | 39  | 45   | 51  | 52   | 53  | 56  | 58   | 59  | 66   | 68  |       |       | 6    | 11   |     |
| <b>Equatorial Guinea (1)</b><br>22 [0.1]<br>{Middle Africa}<br>High Income | Garcia-Espinosa 2009 | N         | C-S    | .          | 15-71     | C         | PGMY9 /11 | ESP                     | LSIL                 | 2   | 0    | 0                                               | 0    | 0    | 0    | 0   | 0   | 0    | 0   | 0    | 0   | 0   | 0    | 0   | 0    | 0   | 0     | 0     | 0    | 0    |     |
|                                                                            | Garcia-Espinosa 2009 | N         | C-S    | .          | 15-71     | C         | PGMY9 /11 |                         | HSIL                 | 17  | 70.6 | 17.6                                            | 5.9  | 5.9  | 17.6 | 0   | 0   | 0    | 0   | 5.9  | 0   | 0   | 11.8 | 0   | 0    | 0   | 0     | 0     | 0    | 0    | 5.9 |
|                                                                            | Garcia-Espinosa 2009 | N         | C-S    | .          | 15-71     | C         | PGMY9 /11 |                         | ICC                  | 3   | 100  | 33.3                                            | 0    | 0    | 33.3 | 0   | 0   | 0    | 0   | 0    | 0   | 0   | 33.3 | 0   | 0    | 0   | 0     | 0     | 0    | 0    | 0   |
| <b>Ethiopia (3)</b><br>566 [2.1]<br>{Eastern Africa}<br>Low Income         | Abate 2013a          | N         | C-S    | 48         | 30-75     | H         | SPF       | ETH                     | LSIL                 | 11  | 100  | 100                                             | 27.3 | 18.2 | 18.2 | 0   | 0   | 9.1  | 0   | 18.2 | 0   | 0   | 27.3 | 0   | 0    | 0   | 0     | 0     | 0    | 0    |     |
|                                                                            | Abate 2013a          | N         | C-S    | 48         | 30-75     | H         | SPF       |                         | HSIL                 | 13  | 84.6 | 61.5                                            | 15.4 | 0    | 7.7  | 0   | 0   | 7.7  | 0   | 38.5 | 0   | 0   | 15.4 | 0   | 0    | 0   | 7.7   | 0     | 0    | 0    |     |
|                                                                            | Abate 2013a          | N         | C-S    | 48         | 30-75     | H         | SPF       |                         | ICC                  | 136 | 92.6 | 86                                              | 19.1 | 5.9  | 5.9  | 4.4 | 3.7 | 11.8 | 0   | 22.8 | 0   | 0.7 | 20.6 | 0   | 1.5  | 6.6 | 10.3  | 0     | 0    | 3.7  |     |
|                                                                            | Bekele 2010          | N         | C-S    | 45         | 32-65     | H         | GP5/6     |                         | HSIL+                | 122 | 67.2 | 55.7                                            | 8.2  | 1.6  | 0.8  | 1.6 | 3.3 | 4.1  | 0   | 1.6  | 0   | 8.2 | 0.8  | 0.8 | 0    | 0   | .     | .     | 0    | 36.9 |     |
|                                                                            | Fanta 2005           | N         | C-S    | 38         | .         | H         | GP5/6     |                         | Norm                 | 8   | 50   | 0                                               | 0    | 12.5 | 0    | 0   | 0   | 0    | 0   | 0    | 0   | 0   | 0    | 0   | 0    | 0   | 0     | 0     | 0    | 25   |     |
|                                                                            | Fanta 2005           | N         | C-S    | 38         | .         | H         | GP5/6     |                         | ASC                  | 79  | 89.9 | 77.2                                            | 5.1  | 0    | 0    | 0   | 0   | 0    | 0   | 0    | 1.3 | 0   | 1.3  | 0   | 0    | 0   | 0     | 0     | 0    | 0    | 3.8 |
|                                                                            | Fanta 2005           | N         | C-S    | 38         | .         | H         | GP5/6     |                         | HSIL                 | 34  | 88.2 | 64.7                                            | 5.9  | 2.9  | 2.9  | 0   | 0   | 0    | 0   | 0    | 0   | 0   | 0    | 0   | 2.9  | 0   | 0     | 0     | 0    | 88.2 |     |
| <b>Gambia (1)</b> 16 [0.1]<br>{Western Africa}<br>Low Income               | Wall 2005            | N         | C-S    | 33.5       | 15-54     | C         | GP5/6     | GBR                     | HSIL                 | 15  | 86.7 | 20                                              | 6.7  | 6.7  | 20   | 6.7 | 6.7 | 6.7  | 0   | 0    | 0   | 0   | 20   | 0   | 0    | 0   | 0     | 0     | 0    | 0    |     |
|                                                                            | Wall 2005            | N         | C-S    | 33.5       | 15-54     | C         | GP5/6     |                         | ICC                  | 1   | 100  | 100                                             | 0    | 0    | 0    | 0   | 0   | 0    | 0   | 0    | 0   | 0   | 0    | 0   | 0    | 0   | 0     | 0     | 0    | 0    |     |
| <b>Ghana (1)</b> 163 [0.6]<br>{Western Africa}<br>Low Middle Income        | Denny 2013a          | Y/N       | C-S    | 58         | 25-96     | H         | SPF       | NLD                     | ICC                  | 163 | 93.9 | 41.1                                            | 14.1 | 0.6  | 2.5  | 4.9 | 0.6 | 4.9  | 1.2 | 1.8  | 0   | 1.2 | 0.6  | 0   | 0    | .   | .     | 0.6   | 17.8 |      |     |
| <b>Guinea (2)</b> 926 [3.5]<br>{Western Africa}<br>Low Income              | Bosch 1995c          | N         | C-S    | 34         | .         | H         | PGMY9 /11 | USA                     | ICC                  | 18  | 100  | 38.9                                            | 5.6  | 22.2 | .    | .   | 0   | 33.3 | .   | .    | .   | .   | 0    | .   | .    | 0   | 0     | 0     | 0    |      |     |
|                                                                            | Keita 2009           | N         | C-S    | 45         | 18-64     | C         | GP5/6     | NLD                     | Norm                 | 752 | 47.9 | 6.6                                             | 3.2  | 1.3  | 2.9  | 3.2 | 0.9 | 4.7  | 1.9 | 4    | 0.8 | 2.1 | 3.2  | 0.8 | 3.5  | 0.9 | 1.2   | 3.9   | 19.8 | 15.8 |     |
|                                                                            | Keita 2009           | N         | C-S    | 45         | 18-64     | H         | GP5/6     |                         | ICC                  | 77  | 90.9 | 48.1                                            | 13   | 0    | 2.6  | 3.9 | 2.6 | 16.9 | 0   | 0    | 0   | 0   | 0    | 0   | 0    | 0   | 0     | 2.6   | 3.9  |      |     |
|                                                                            | Keita 2009           | N         | C-S    | 45         | 18-64     | H         | GP5/6     |                         | ASC+                 | 79  | 78.5 | 13.9                                            | 3.8  | 6.3  | 11.4 | 5.1 | 0   | 6.3  | 2.5 | 8.9  | 8.9 | 2.5 | 5.1  | 0   | 10.1 | 1.3 | 2.5   | 0     | 26.6 | 35.4 |     |

| Country (S)<br>N [%]<br>{Region}<br>GNI                           | Study             | HIV (Y/N) | Design | Median Age | Age range | Pathology | Primer    | HPV genotyping location | Cervical Lesion/Norm | N    | Any  | HPV-specific prevalence (% of all cases tested) |      |      |      |      |      |      |      |      |     |      |      |     |      | Other | Multi |      |      |      |
|-------------------------------------------------------------------|-------------------|-----------|--------|------------|-----------|-----------|-----------|-------------------------|----------------------|------|------|-------------------------------------------------|------|------|------|------|------|------|------|------|-----|------|------|-----|------|-------|-------|------|------|------|
|                                                                   |                   |           |        |            |           |           |           |                         |                      |      |      | 16                                              | 18   | 31   | 33   | 35   | 39   | 45   | 51   | 52   | 53  | 56   | 58   | 59  | 66   |       |       | 68   | 6    | 11   |
| Kenya (8)<br>2253 [8.4]<br>{Eastern Africa}<br>Low Income         | Czegledy 1992     | N         | C-S    | 25.8       | 20-35     | C         | IH        | SWE                     | Norm                 | 77   | 19.5 | 6.5                                             | 3.9  | 0    | 1.3  | .    | .    | .    | .    | .    | .   | .    | .    | .   | .    | .     | .     | 9.1  | 1.3  |      |
|                                                                   | De Vuyst 2003     | N         | C-S    | 35         | 25-55     | C         | SPF       | BEL                     | Norm                 | 369  | 38.8 | 3.5                                             | 2.2  | 3.3  | 1.9  | 2.7  | 1.4  | 1.6  | 1.1  | 6.2  | 2.7 | 1.4  | 2.7  | 0   | 3.5  | 1.6   | 0.5   | 6.7  | 11.4 | .    |
|                                                                   | De Vuyst 2003     | N         | C-S    | 35         | 25-55     | C         | SPF       |                         | LSIL                 | 30   | 60   | 13.3                                            | 6.7  | 3.3  | 0    | 23.3 | 0    | 3.3  | 3.3  | 13.3 | 10  | 3.3  | 6.7  | 0   | 3.3  | 3.3   | 0     | 0    | 10   | .    |
|                                                                   | De Vuyst 2003     | N         | C-S    | 35         | 25-55     | C         | SPF       | BEL                     | HSIL                 | 29   | 96.6 | 34.5                                            | 3.4  | 6.9  | 3.4  | 17.2 | 0    | 6.9  | 10.3 | 24.1 | 0   | 3.4  | 6.9  | 0   | 10.3 | 6.9   | 0     | 0    | 3.4  | .    |
|                                                                   | De Vuyst 2008     | Y/N       | C-S    | 42.5       | 5         | C         | SPF       | ITA                     | ICC                  | 204  | 97.5 | 43.1                                            | 20.1 | 3.9  | 3.4  | 5.9  | 2.5  | 13.7 | 1    | 8.8  | 1   | 2    | 0.5  | 0.5 | 1.5  | 1.5   | 0     | 0.4  | 2.9  | 19.6 |
|                                                                   | De Vuyst 2010     | N         | C-S    | .          | >15       | C         | PGMY9 /11 | ITA                     | Norm                 | 454  | 40.3 | 7.5                                             | 4.4  | 1.8  | 3.3  | 0.4  | 0.9  | 1.8  | 3.5  | 4.2  | 6.6 | 1.8  | 9.9  | 1.3 | 2.6  | 1.5   | 4.6   | 33.3 | 22   | 32.6 |
|                                                                   | De Vuyst 2010     | N         | C-S    | .          | >15       | C         | SPF       |                         | ASC+                 | 42   | 59.5 | 9.5                                             | 7.1  | 2.4  | 0    | 2.4  | 2.4  | 7.1  | 0    | 2.4  | 7.1 | 16.7 | 16.7 | 0   | 2.4  | 2.4   | 2.4   | 0    | 16.7 | 28.6 |
|                                                                   | De Vuyst 2012     | Y         | C-S    | 38.1       | 18 - 55   | H         | GP5/6     | BEL                     | Norm                 | 172  | 60.5 | 2.9                                             | 5.2  | 5.2  | 0    | 9.9  | 2.3  | 4.1  | 2.3  | 7.6  | 0   | 6.4  | 1.7  | 0   | 0    | 2.9   | 2.9   | 0    | 2.3  | 32   |
|                                                                   | De Vuyst 2012     | Y         | C-S    | 38.1       | 18 - 55   | H         | GP5/6     |                         | LSIL                 | 186  | 64   | 9.7                                             | 3.2  | 2.2  | 5.4  | 9.1  | 1.1  | 3.8  | 4.3  | 6.5  | 0   | 4.8  | 4.3  | 0.5 | 0    | 1.6   | 1.6   | 0.9  | 1.6  | 34.9 |
|                                                                   | De Vuyst 2012     | Y         | C-S    | 38.1       | 18 - 55   | H         | GP5/6     |                         | HSIL                 | 113  | 90.3 | 26.5                                            | 10.6 | 10.6 | 4.4  | 19.5 | 7.1  | 9.7  | 6.2  | 9.7  | 0   | 8.8  | 12.4 | 3.5 | 0    | 1.8   | 5.3   | 1.3  | 0    | 63.7 |
|                                                                   | Maranga 2013      | Y/N       | C-S    | 42         | 27-68     | C         | IH        | GBR                     | ICC                  | 77   | 72.7 | 44.2                                            | 27.3 | .    | .    | .    | .    | 9.1  | .    | 0    | .   | 0    | 0    | .   | .    | .     | .     | .    | 0    | .    |
|                                                                   | Rahman 2011       | Y/N       | C-S    | 31.2       | 16-61     | C         | GP5/6     | JPN                     | Norm                 | 201  | 49.8 | 5.5                                             | 3.5  | 4.5  | 1    | 4.5  | 12.9 | 4.5  | 2.5  | 11.9 | 8.5 | 6    | 1.5  | 4.5 | 3.5  | 4     | 2.5   | 5.7  | 17.4 | .    |
|                                                                   | Rahman 2011       | Y/N       | C-S    | 31.2       | 16-61     | C         | GP5/6     |                         | ASC                  | 122  | 49.2 | 4.1                                             | 0    | 4.9  | 2.5  | 3.3  | 7.4  | 10.7 | 9.8  | 11.5 | 2.5 | 5.7  | 1.6  | 4.1 | 7.4  | 8.2   | 2.5   | 1.4  | 25.4 | .    |
| Rahman 2011                                                       | Y/N               | C-S       | 31.2   | 16-61      | C         | GP5/6     |           | LSIL                    | 141                  | 48.9 | 5.7  | 5                                               | 8.5  | 5    | 2.8  | 5.7  | 8.5  | 3.5  | 7.8  | 6.4  | 9.9 | 3.5  | 3.5  | 4.3 | 3.5  | 2.1   | 4.3   | 24.1 | .    |      |
| Rahman 2011                                                       | Y/N               | C-S       | 31.2   | 16-61      | C         | GP5/6     |           | HSIL                    | 23                   | 47.8 | 4.3  | 13                                              | 13   | 0    | 17.4 | 13   | 17.4 | 13   | 8.7  | 8.7  | 8.7 | 4.3  | 0    | 4.3 | 8.7  | 0     | 0     | 39.1 | .    |      |
| Rogo 1990                                                         | N                 | C-S       | 34     | 28-51      | C         | IH        | SWE       | ICC                     | 13                   | 100  | 84.6 | 69.2                                            | .    | 0    | .    | .    | .    | .    | .    | .    | .   | .    | .    | .   | .    | .     | 23.1  | .    | 0    | 92.3 |
| Mali (3)<br>167 [0.6]<br>{Western Africa}<br>Low Income           | Bayo 2002         | N         | C-C    | 46.9       | 18-80     | H         | GP5/6     | BEL                     | Norm                 | 12   | 33.3 | 0                                               | 8.3  | 0    | 0    | 0    | 0    | 0    | 0    | 0    | 0   | 0    | 0    | 0   | 0    | 0     | 0     | 0    | 25   | 0    |
|                                                                   | Bayo 2002         | N         | C-C    | 46.9       | 18-80     | H         | GP5/6     |                         | ICC                  | 65   | 96.9 | 47.7                                            | 12.3 | 0    | 1.5  | 1.5  | 0    | 10.8 | 6.2  | 0    | 0   | 0    | 3.1  | 0   | 0    | 0     | 0     | 0    | 0    | 10.8 |
|                                                                   | Bosch 1995d       | N         | C-S    | 34         | .         | H         | PGMY9 /11 | USA                     | ICC                  | 58   | 89.7 | 34.5                                            | 1.7  | 1.7  | .    | .    | 0    | 17.2 | .    | .    | .   | .    | 0    | .   | .    | 0     | 0     | 0    | .    |      |
|                                                                   | Ndiaye 2012a      | N         | C-S    | 51.9       | <39 - >60 | H         | SPF       | ESP                     | ICC                  | 32   | 87.5 | 40.6                                            | 6.3  | .    | .    | .    | .    | 12.5 | .    | .    | .   | .    | .    | .   | .    | .     | 0     | .    | 0    | 0    |
| Morocco (3)<br>1328 [5]<br>{Northern Africa}<br>Low Middle Income | Alhamany 2010     | N         | C-S    | 42.5       | 17-83     | C         | MY9/11    | N.S.                    | Norm                 | 785  | 15.8 | 2.2                                             | 1.4  | 0.5  | 0.1  | 0.4  | .    | 0.3  | .    | .    | .   | .    | .    | .   | .    | .     | .     | 11   | 0    |      |
|                                                                   | Alhamany 2010     | N         | C-S    | 42.5       | 17-80     | C         | MY9/11    |                         | ASC                  | 46   | 6.5  | 2.2                                             | 2.2  | 2.2  | 2.2  | 0    | .    | 0    | .    | .    | .   | .    | .    | .   | .    | .     | .     | 0    | 2.2  |      |
|                                                                   | Alhamany 2010     | N         | C-S    | 42.5       | 17-82     | C         | MY9/11    |                         | LSIL                 | 24   | 16.7 | 16.7                                            | 4.2  | 0    | 0    | 0    | .    | 0    | .    | .    | .   | .    | .    | .   | .    | .     | .     | 0    | 4.2  |      |
|                                                                   | Alhamany 2010     | N         | C-S    | 42.5       | 17-81     | C         | MY9/11    |                         | HSIL                 | 7    | 42.9 | 14.3                                            | 28.6 | 28.6 | 0    | 0    | .    | 0    | .    | .    | .   | .    | .    | .   | .    | .     | .     | 0    | 14.3 |      |
|                                                                   | Alhamany 2010     | N         | C-S    | 42.5       | 17-80     | C         | MY9/11    |                         | ASC+                 | 13   | 100  | 46.2                                            | 38.5 | 23.1 | 7.7  | 0    | .    | 0    | .    | .    | .   | .    | .    | .   | .    | .     | .     | 84.6 | 23.1 |      |
|                                                                   | Chaouki 1998      | N         | C-C    | 40.7       | 18-70     | C         | GP5/6     | FRA                     | Norm                 | 203  | 18.7 | 3.9                                             | 1    | 0    | 0    | 0.5  | 0    | 1.5  | 0.5  | 0.5  | 0   | 0.5  | 0.5  | 0   | 0    | 0.5   | 1     | 0    | 4.4  | 1    |
|                                                                   | Chaouki 1998      | N         | C-C    | 49.7       | 21-73     | H         | GP5/6     |                         | ICC                  | 168  | 85.7 | 53                                              | 7.7  | 2.4  | 0.6  | 0.6  | 0    | 4.8  | 0    | 1.2  | 0   | 0    | 0    | 1.8 | 0.6  | 0     | 0.6   | 0    | 5.4  | 7.1  |
| Mzibri 2009                                                       | N                 | C-S       | 61     | 34-88      | H         | MY9/11    | MAR       | ICC                     | 82                   | 90.2 | 67.1 | 42.7                                            | 0    | 0    | 0    | 0    | 14.6 | 0    | 0    | 0    | 0   | 0    | 2.4  | 0   | 0    | 0     | 0     | 9.8  | 35.4 |      |
| Mozambique (3)<br>970 [3.6]<br>{Eastern Africa}<br>Low Income     | Castellsague 2008 | N         | C-S    | 34         | 14-61     | C         | SPF       | ESP                     | Norm                 | 195  | 75.9 | 6.2                                             | 10.8 | 10.3 | 5.6  | 14.9 | 9.2  | 3.1  | 17.9 | 9.7  | 4.6 | 3.6  | 1.5  | 0   | 6.2  | 7.2   | 5.1   | 3    | 20.5 | 37.9 |
|                                                                   | Castellsague 2008 | N         | C-S    | 34         | 14-61     | C         | SPF       |                         | ICC                  | 230  | 100  | 47                                              | 31.3 | 2.6  | 4.8  | 10.4 | 1.3  | 12.6 | 15.2 | 14.3 | 1.7 | 0    | 1.7  | 0.4 | 0.4  | 3.5   | 1.3   | 8.2  | 7    | 35.2 |
|                                                                   | Castellsague 2008 | N         | C-S    | 34         | 14-61     | C         | SPF       |                         | ASC+                 | 49   | 89.8 | 8.2                                             | 10.2 | 4.1  | 10.2 | 26.5 | 6.1  | 4.1  | 16.3 | 24.5 | 4.1 | 6.1  | 16.3 | 0   | 0    | 6.1   | 2     | 2.8  | 8.2  | 53.1 |
|                                                                   | Naucler 2004      | Y/N       | C-S    | 46         |           | H         | GP5/6     | SWE                     | ICC                  | 72   | 97.2 | 55.6                                            | 26.4 | 2.8  | 9.7  | 19.4 | 0    | 23.6 | 1.4  | 1.4  | 0   | 1.4  | 1.4  | 0   | 2.8  | 1.4   | .     | .    | 0    | 62.5 |

| Country (S)<br>N [%]<br>{Region}<br>GNI                                      | Study        | HIV (Y/N) | Design | Median Age | Age range  | Pathology | Primer   | HPV genotyping location | Cervical Lesion/Norm | N    | Any  | HPV-specific prevalence (% of all cases tested) |      |      |      |      |     |      |      |      |      |      |     |      |      | Other | Multi |      |      |      |     |
|------------------------------------------------------------------------------|--------------|-----------|--------|------------|------------|-----------|----------|-------------------------|----------------------|------|------|-------------------------------------------------|------|------|------|------|-----|------|------|------|------|------|-----|------|------|-------|-------|------|------|------|-----|
|                                                                              |              |           |        |            |            |           |          |                         |                      |      |      | 16                                              | 18   | 31   | 33   | 35   | 39  | 45   | 51   | 52   | 53   | 56   | 58  | 59   | 66   |       |       | 68   | 6    | 11   |     |
|                                                                              | Naucler 2011 | Y/N       | C-C    | 45         |            | H         | GP5/6    | SWE                     | Norm                 | 203  | 31   | 6.4                                             | 3    | 2    | 1.5  | 1.5  | 1   | 3    | 0.5  | 5.4  | .    | 1.5  | 3.9 | 0.5  | 4.4  | 0     | 0     | 0    | 8.9  | 9.4  |     |
|                                                                              | Naucler 2011 | Y/N       | C-C    | 33         |            | H         | GP5/6    |                         | ICC                  | 221  | 84.2 | 49.8                                            | 20.4 | 0.9  | 3.2  | 3.6  | 0   | 14.5 | 1.4  | 2.3  | .    | 1.8  | 0.9 | 2.3  | 1.8  | 0     | 0     | 0.7  | 0.9  | 19   |     |
| Nigeria (4)<br>2485 [9.3]<br>{Western Africa}<br>Low Middle Income           | Denny 2013c  | Y/N       | C-S    | 57         | 27-102     | C         | SPF      | NLD                     | ICC                  | 179  | 84.9 | 42.5                                            | 11.7 | 1.7  | 1.1  | 7.3  | 1.1 | 6.1  | 2.2  | 2.2  | 0.6  | 0.6  | 1.1 | 2.2  | 0    | .     | .     | .    | 0    | 3.4  |     |
|                                                                              | Gage 2012    | N         | C-S    | 45         | >15        | C         | MY9/11   | USA                     | Norm                 | 1075 | 10.5 | 1.5                                             | 1.2  | 2    | 0.2  | 1.5  | 0.3 | 0.4  | 0.8  | 1.9  | 0    | 0.6  | 1.7 | 0.4  | 0    | 0.7   | .     | .    | 0    | 2.2  |     |
|                                                                              | Gage 2012    | N         | C-S    | 45         | >15        | C         | MY9/11   |                         | HSIL+                | 32   | 65.6 | 21.9                                            | 6.3  | 9.4  | 3.1  | 18.8 | 0   | 6.3  | 3.1  | 6.3  | 0    | 0    | 3.1 | 0    | 0    | 0     | .     | .    | 0    | 9.4  |     |
|                                                                              | Gage 2012    | N         | C-S    | 45         | >15        | C         | MY9/11   |                         | ASC+                 | 112  | 55.4 | 8.9                                             | 2.7  | 8    | 0.9  | 11.6 | 1.8 | 1.8  | 8.9  | 8    | 0    | 2.7  | 7.1 | 1.8  | 0    | 1.8   | .     | .    | 0    | 8    |     |
|                                                                              | Gage 2012    | N         | C-S    | 45         | >15        | C         | MY9/11   |                         | UNS                  | 80   | 51.3 | 3.8                                             | 1.3  | 7.5  | 0    | 8.8  | 2.5 | 0    | 11.3 | 8.8  | 0    | 3.8  | 8.8 | 2.5  | 0    | 2.5   | .     | .    | 0    | 7.5  |     |
|                                                                              | Okolo 2010   | N         | C-S    | 55         | >15, 31-80 | H         | GP5/6    | NLD                     | ICC                  | 75   | 90.7 | 61.3                                            | 9.3  | 1.3  | 1.3  | 5.3  | 1.3 | 5.3  | 4    | 0    | 0    | 5.3  | 0   | 0    | 0    | 0     | 0     | 0    | 0    | 1.3  | 6.7 |
|                                                                              | Thomas 2004  | N         | C-S    | 45         | >15        | C         | GP5/6    | FRA                     | Norm                 | 844  | 24.8 | 3                                               | 1.7  | 2.6  | 0.6  | 3    | 0.6 | 2.1  | 1.1  | 1.5  | 0.2  | 2.1  | 2.5 | 0.6  | 2    | 0.2   | 0.4   | 3.4  | 11.3 | 21.7 |     |
| Thomas 2004                                                                  | N            | C-S       | 45     | >15        | C          | GP5/6     |          | ASC+                    | 88                   | 40.9 | 5.7  | 4.5                                             | 5.7  | 0    | 5.7  | 1.1  | 1.1 | 5.7  | 4.5  | 0    | 4.5  | 2.3  | 0   | 3.4  | 0    | 5.7   | 0.6   | 19.3 | 15.9 |      |     |
| Rwanda (1)<br>647 [2.4]<br>{Eastern Africa}<br>Low Income                    | Singh 2009   | Y/N       | C-S    | 34         | >25        | C         | MY9/11   | Not stated              | Norm                 | 435  | 59.8 | 6.2                                             | 4.1  | 2.8  | 2.5  | 4.6  | 1.1 | 1.4  | 5.1  | 5.1  | 6.4  | 2.1  | 5.3 | 1.6  | 1.1  | 3.7   | 2.8   | 9.1  | 25.3 | 27.1 |     |
|                                                                              | Singh 2009   | Y/N       | C-S    | 34         | >25        | C         | MY9/11   |                         | ASC                  | 44   | 77.3 | 2.3                                             | 9.1  | 2.3  | 6.8  | 6.8  | 0   | 0    | 4.5  | 6.8  | 4.5  | 4.5  | 9.1 | 2.3  | 2.3  | 6.8   | 4.5   | 0    | 15.9 | 29.5 |     |
|                                                                              | Singh 2009   | Y/N       | C-S    | 34         | >25        | C         | MY9/11   |                         | LSIL                 | 99   | 86.9 | 20.2                                            | 13.1 | 5.1  | 6.1  | 18.2 | 6.1 | 4    | 15.2 | 14.1 | 15.2 | 15.2 | 7.1 | 5.1  | 11.1 | 6.1   | 4     | 2.9  | 45.5 | 59.6 |     |
|                                                                              | Singh 2009   | Y/N       | C-S    | 34         | >25        | C         | MY9/11   |                         | HSIL+                | 69   | 94.2 | 23.2                                            | 8.7  | 10.1 | 18.8 | 18.8 | 4.3 | 1.4  | 18.8 | 10.1 | 10.1 | 18.8 | 7.2 | 17.4 | 1.4  | 1.4   | 7.2   | 4.1  | 63.8 | 56.5 |     |
| Senegal (4)<br>2492 [9.3]<br>{Western Africa}<br>Low Middle Income           | Astori 1999  | N         | C-S    | 36         | <30 - >50  | C         | MY9/11   | ITA                     | Norm                 | 158  | 13.9 | 5.7                                             | 1.3  | 1.3  | 1.3  | 0    | 0   | 0    | 0    | 1.3  | 1.9  | 0    | 1.9 | 0    | 0    | 1.3   | 0     | 0    | 0    | 1.9  |     |
|                                                                              | Chabaud 1996 | N         | C-S    | 30         | 13-71      | C         | IH       | FRA                     | Norm                 | 26   | 23.1 | 19.2                                            | 3.8  | 0    | 0    | .    | .   | .    | .    | .    | .    | .    | .   | .    | .    | .     | 0     | 0    | 0    | .    |     |
|                                                                              | Chabaud 1996 | N         | C-S    | 30         | 13-71      | C         | IH       |                         | LSIL                 | 42   | 92.9 | 40.5                                            | 33.3 | 2.4  | 0    | 0    | .   | 11.9 | .    | 4.8  | .    | .    | 0   | .    | .    | 0     | 28.6  | 26.1 | 9.5  | .    |     |
|                                                                              | Chabaud 1996 | N         | C-S    | 30         | 13-71      | C         | IH       |                         | HSIL                 | 23   | 95.7 | 43.5                                            | 47.8 | 0    | 4.3  | 0    | 0   | 8.7  | .    | 0    | .    | .    | 0   | .    | .    | 4.3   | 21.7  | 8.7  | 0    | .    |     |
|                                                                              | Chabaud 1996 | N         | C-S    | 30         | 13-71      | C         | IH       |                         | UNS                  | 46   | 23.9 | 15.2                                            | 8.7  | 0    | 0    | .    | .   | .    | .    | .    | .    | .    | .   | .    | .    | .     | 0     | 0    | 0    | .    |     |
|                                                                              | Ndiaye 2012b | N         | C-S    | 51.9       | <39 - >61  | H         | SPF      |                         | ICC                  | 132  | 83.3 | 35.6                                            | 9.8  | .    | .    | .    | .   | 11.4 | .    | .    | .    | .    | .   | .    | .    | .     | 0     | .    | 0    | 0    |     |
|                                                                              | Xi 2003      | N         | C-S    | 42.7       | >35        | C         | MY9/11   | USA                     | Norm                 | 1639 | 12.5 | 1                                               | 0.9  | 0.4  | 0.7  | 0    | 0.1 | 0.2  | 0.3  | 0.5  | 0.7  | 0.3  | 0.7 | 0.4  | 0.2  | 0.1   | 0.2   | 0    | 7.4  | 1.2  |     |
|                                                                              | Xi 2003      | N         | C-S    | 42.7       | >35        | C         | MY9/11   |                         | ASC                  | 254  | 20.5 | 2.4                                             | 1.6  | 0.8  | 1.6  | 0.4  | 1.2 | 0.4  | 0    | 0.4  | 1.2  | 0.4  | 0.8 | 0    | 0.4  | 0     | 0     | 0    | 13.4 | 3.1  |     |
|                                                                              | Xi 2003      | N         | C-S    | 42.7       | >35        | C         | MY9/11   |                         | LSIL                 | 86   | 51.2 | 8.1                                             | 4.7  | 1.2  | 2.3  | 3.5  | 0   | 0    | 1.2  | 3.5  | 3.5  | 1.2  | 9.3 | 2.3  | 1.2  | 0     | 2.3   | 1.2  | 14   | 7    |     |
| Xi 2003                                                                      | N            | C-S       | 42.7   | >35        | C          | MY9/11    |          | HSIL+                   | 86                   | 75.6 | 23.3 | 4.7                                             | 5.8  | 8.1  | 1.2  | 1.2  | 0   | 3.5  | 8.1  | 2.3  | 1.2  | 12.8 | 0   | 2.3  | 1.2  | 2.3   | 1.4   | 22.1 | 15.1 |      |     |
| South Africa (18)<br>5082 [19.0]<br>{Southern Africa}<br>Upper Middle Income | Allan 2008   | N         | C-S    | 44         | 21-59      | C         | PGMY9/11 | ZAF                     | Norm                 | 848  | 20.4 | 2                                               | 1.3  | 0.5  | 1.1  | 0.6  | 0.6 | 1.4  | 0.7  | 1.9  | 2.2  | 0.4  | 1.1 | 1.1  | 0.2  | 1.3   | 0.5   | 1.7  | 5.7  | 8.8  |     |
|                                                                              | Allan 2008   | N         | C-S    | 44         | 21-59      | C         | PGMY9/11 |                         | ASC                  | 115  | 41.7 | 5.2                                             | 3.5  | 2.6  | 3.5  | 1.7  | 7   | 6.1  | 0.9  | 12.2 | 5.2  | 0.9  | 0.9 | 2.6  | 2.6  | 0.9   | 0.9   | 0    | 14.8 | 53   |     |
|                                                                              | Allan 2008   | N         | C-S    | 44         | 21-59      | C         | PGMY9/11 |                         | LSIL                 | 57   | 70.2 | 12.3                                            | 8.8  | 3.5  | 7    | 12.3 | 5.3 | 5.3  | 8.8  | 17.5 | 15.8 | 3.5  | 5.3 | 3.5  | 3.5  | 0     | 0     | 0    | 22.8 | 93   |     |
|                                                                              | Allan 2008   | N         | C-S    | 44         | 21-59      | C         | PGMY9/11 |                         | HSIL                 | 53   | 83   | 18.9                                            | 7.5  | 11.3 | 5.7  | 18.9 | 1.9 | 5.7  | 5.7  | 11.3 | 5.7  | 0    | 3.8 | 1.9  | 5.7  | 1.9   | 1.9   | 0    | 13.2 | 64.2 |     |
|                                                                              | Cooper 1991a | N         | C-S    | .          | <30 - >60  | H         | IH       | ZAF                     | HSIL                 | 72   | 50   | 22.2                                            | 9.7  | 0    | 11.1 | 6.9  | 0   | .    | .    | .    | .    | .    | .   | .    | .    | .     | .     | .    | 0    | 18.1 |     |

| Country (S)<br>N [%]<br>{Region}<br>GNI | Study          | HIV (Y/N) | Design | Median Age | Age range    | Pathology | Primer    | HPV genotyping location | Cervical Lesion/Norm | N   | Any  | HPV-specific prevalence (% of all cases tested) |      |      |      |      |      |      |      |      |      |      |      |      |      |      | Other | Multi |      |      |
|-----------------------------------------|----------------|-----------|--------|------------|--------------|-----------|-----------|-------------------------|----------------------|-----|------|-------------------------------------------------|------|------|------|------|------|------|------|------|------|------|------|------|------|------|-------|-------|------|------|
|                                         |                |           |        |            |              |           |           |                         |                      |     |      | 16                                              | 18   | 31   | 33   | 35   | 39   | 45   | 51   | 52   | 53   | 56   | 58   | 59   | 66   | 68   |       |       | 6    | 11   |
|                                         | Cooper 1991b   | N         | C-S    | .          | <30 - >60    | H         | IH        | N.S.                    | ICC                  | 69  | 63.8 | 42                                              | 21.7 | 0    | 0    | 0    | 0    | .    | .    | .    | .    | .    | .    | .    | .    | .    | .     | 0     | .    |      |
|                                         | Denny 2008     | Y/N       | C-S    | 29.4       | 18-54        | C         | PGMY9 /11 | ZAF                     | Norm                 | 174 | 55.2 | 7.5                                             | 5.2  | 0    | 0    | 5.7  | 0    | 0    | 0    | 6.9  | 13.2 | 0    | 0    | 0    | 0    | 0    | 0     | 0     | 0    | 24.7 |
|                                         | Denny 2008     | Y/N       | C-S    | 29.4       | 18-54        | C         | PGMY9 /11 |                         | ASC                  | 29  | 86.2 | 17.2                                            | 13.8 | 0    | 0    | 20.7 | 0    | 0    | 0    | 17.2 | 6.9  | 0    | 0    | 0    | 0    | 0    | 0     | 0     | 0    | 58.6 |
|                                         | Denny 2008     | Y/N       | C-S    | 28.3       | 18-54        | C         | PGMY9 /11 |                         | LSIL                 | 137 | 91.2 | 21.2                                            | 13.9 | 0    | 0    | 22.6 | 0    | 0    | 0    | 21.9 | 16.8 | 0    | 0    | 0    | 0    | 0    | 0     | 0     | 0    | 67.2 |
|                                         | Denny 2008     | Y/N       | C-S    | 31.5       | 18-54        | C         | PGMY9 /11 |                         | HSIL                 | 50  | 100  | 26                                              | 18   | 0    | 0    | 18   | 0    | 0    | 0    | 22   | 20   | 0    | 0    | 0    | 0    | 0    | 0     | 0     | 0    | 70   |
|                                         | Denny 2014b    | Y/N       | C-S    | 52         | 29-85        | H         | SPF       | NLD                     | ICC                  | 228 | 92.1 | 37.7                                            | 14.5 | 1.3  | 5.3  | 7.9  | 0.4  | 6.1  | 0.9  | 1.3  | 0    | 0.9  | 0    | 0.4  | 0.4  | .    | .     | .     | 2.2  | 9.6  |
|                                         | Firnhaber 2009 | Y         | C-S    | 37         | 18-65        | C         | PGMY9 /11 | ZAF                     | Norm                 | 64  | 89.1 | 25                                              | 12.5 | 6.3  | 3.1  | 12.5 | 6.3  | 17.2 | 7.8  | 10.9 | 18.8 | 9.4  | 6.3  | 7.8  | 4.7  | 7.8  | 0     | 0     | 10.9 | 64.1 |
|                                         | Firnhaber 2009 | Y         | C-S    | 35         | 18-65        | C         | PGMY9 /11 |                         | HSIL+                | 23  | 100  | 60.9                                            | 8.7  | 13   | 13   | 43.5 | 13   | 17.4 | 26.1 | 21.7 | 13   | 26.1 | 17.4 | 17.4 | 26.1 | 8.7  | 0     | 0     | 60.9 | 100  |
|                                         | Firnhaber 2009 | Y         | C-S    | 36         | 18-65        | C         | PGMY9 /11 |                         | UNS                  | 60  | 100  | 23.3                                            | 28.3 | 6.7  | 11.7 | 18.3 | 10   | 15   | 15   | 13.3 | 21.7 | 16.7 | 10   | 11.7 | 15   | 8.3  | 0     | 0     | 35   | 73.3 |
|                                         | Firnhaber 2010 | Y         | C-S    | 34         | 18-65        | C         | PGMY9 /11 | ZAF                     | Norm                 | 90  | 74.4 | 17.8                                            | 12.2 | 0    | 3.3  | 0    | 0    | 0    | 0    | 0    | 0    | 8.9  | 0    | 0    | 5.6  | 0    | 0     | 0     | 0    | 38.9 |
|                                         | Firnhaber 2010 | Y         | C-S    | 34         | 18-65        | C         | PGMY9 /11 |                         | ASC                  | 12  | 100  | 8.3                                             | 8.3  | 0    | 0    | 0    | 0    | 0    | 0    | 0    | 0    | 8.3  | 0    | 0    | 8.3  | 0    | 0     | 0     | 0    | 50   |
|                                         | Firnhaber 2010 | Y         | C-S    | 34         | 18-65        | C         | PGMY9 /11 |                         | LSIL                 | 51  | 98   | 31.4                                            | 35.3 | 0    | 9.8  | 0    | 0    | 0    | 0    | 0    | 0    | 19.6 | 0    | 0    | 19.6 | 0    | 0     | 0     | 0    | 68.6 |
|                                         | Firnhaber 2010 | Y         | C-S    | 34         | 18-65        | C         | PGMY9 /11 |                         | HSIL                 | 34  | 94.1 | 44.1                                            | 2.9  | 0    | 14.7 | 0    | 0    | 0    | 0    | 0    | 0    | 23.5 | 0    | 0    | 17.6 | 0    | 0     | 0     | 0    | 61.8 |
|                                         | Firnhaber 2010 | Y         | C-S    | 34         | 18-65        | C         | PGMY9 /11 |                         | ICC                  | 2   | 100  | 50                                              | 50   | 0    | 0    | 0    | 0    | 0    | 0    | 0    | 0    | 0    | 0    | 0    | 0    | 0    | 0     | 0     | 0    | 100  |
|                                         | Firnhaber 2010 | Y         | C-S    | 34         | 18-65        | C         | PGMY9 /11 |                         | UNS                  | 2   | 100  | 50                                              | 50   | 0    | 0    | 0    | 0    | 0    | 0    | 0    | 0    | 0    | 0    | 0    | 0    | 0    | 0     | 0     | 0    | 100  |
|                                         | Jones 2007     | N         | C-S    | .          | >18          | C         | PGMY9 /11 | ZAF                     | Norm                 | 151 | 45   | 4                                               | 6.6  | 3.3  | 0.7  | 4.6  | 3.3  | 6.6  | 2.6  | 5.3  | 6    | 4    | 7.3  | 0    | 4    | 3.3  | 3.3   | 33.3  | 9.9  | .    |
|                                         | Jones 2007     | N         | C-S    | .          | >18          | C         | PGMY9 /11 |                         | HSIL                 | 6   | 100  | 16.7                                            | 33.3 | 16.7 | 33.3 | 33.3 | 16.7 | 33.3 | 16.7 | 0    | 0    | 0    | 33.3 | 50   | 16.7 | 16.7 | 0     | 0     | 50   | .    |
|                                         | Jones 2007     | N         | C-S    | .          | >18          | C         | PGMY9 /11 |                         | UNS                  | 24  | 45.8 | 8.3                                             | 0    | 4.2  | 4.2  | 4.2  | 4.2  | 8.3  | 8.3  | 12.5 | 8.3  | 4.2  | 4.2  | 8.3  | 4.2  | 4.2  | 0     | 0     | 12.5 | .    |
|                                         | Kay 2003       | N         | C-S    | 35.3       | 19-65, 30-77 | H         | IH        | ZAF                     | HSIL                 | 129 | 88.4 | 56.6                                            | 14   | 10.9 | 14   | 2.3  | 0    | 0    | 0    | 3.9  | 0    | 0    | 3.1  | 0    | 0    | 0    | 0     | 2     | 7    | 12.4 |
|                                         | Kay 2003       | N         | C-S    | 54.6       | 19-65, 30-77 | H         | IH        |                         | ICC                  | 50  | 94   | 82                                              | 10   | 2    | 10   | 2    | 0    | 0    | 0    | 0    | 0    | 0    | 2    | 2    | 0    | 0    | 0     | 0     | 0    | 16   |
|                                         | Marais 2000    | N         | C-S    | 37         | 21-50+       | H         | IH        | ZAF                     | Norm                 | 95  | 44.2 | 25.3                                            | 10.5 | 21.1 | 9.5  | .    | .    | 13.7 | .    | .    | .    | .    | .    | .    | .    | .    | .     | 0     | 21.1 |      |
|                                         | Marais 2000    | N         | C-S    | 54         | 21-50+       | H         | IH        |                         | ICC                  | 40  | 75   | 25                                              | 45   | 37.5 | 12.5 | .    | .    | 55   | .    | .    | .    | .    | .    | .    | .    | .    | .     | 0     | 62.5 |      |
|                                         | Marais 2000    | N         | C-S    | 37         | 21-50+       | H         | IH        |                         | ASC+                 | 95  | 71.6 | 44.2                                            | 20   | 33.7 | 11.6 | .    | .    | 27.4 | .    | .    | .    | .    | .    | .    | .    | .    | .     | 0     | 36.8 |      |
|                                         | Marais 2008    | Y/N       | C-S    | 35         | 22-62        | C         | PGMY9 /11 |                         | Norm                 | 29  | 93.1 | 17.2                                            | 6.9  | 3.4  | 13.8 | 17.2 | 3.4  | 0    | 10.3 | 0    | 3.4  | 17.2 | 13.8 | 3.4  | 0    | 3.4  | 3.4   | 6.5   | 17.2 | 0    |
|                                         | Marais 2008    | Y/N       | C-S    | 35         | 22-62        | C         | PGMY9 /11 |                         | LSIL                 | 31  | 100  | 19.4                                            | 16.1 | 6.5  | 9.7  | 19.4 | 6.5  | 12.9 | 16.1 | 12.9 | 12.9 | 9.7  | 9.7  | 6.5  | 6.5  | 9.7  | 6.5   | 0     | 25.8 | 0    |
|                                         | Marais 2008    | Y/N       | C-S    | 35         | 22-62        | C         | PGMY9 /11 |                         | HSIL                 | 55  | 92.7 | 36.4                                            | 16.4 | 12.7 | 10.9 | 12.7 | 5.5  | 10.9 | 3.6  | 10.9 | 3.6  | 3.6  | 10.9 | 1.8  | 9.1  | 5.5  | 3.6   | 0     | 12.7 | 0    |



| Country (S)<br>N [%]<br>{Region}<br>GNI                     | Study             | HIV (Y/N) | Design | Median Age | Age range | Pathology | Primer    | HPV genotyping location | Cervical Lesion/Norm | N   | Any  | HPV-specific prevalence (% of all cases tested) |      |      |      |      |      |      |      |      |      |      |      |      |      |      | Other | Multi |       |      |
|-------------------------------------------------------------|-------------------|-----------|--------|------------|-----------|-----------|-----------|-------------------------|----------------------|-----|------|-------------------------------------------------|------|------|------|------|------|------|------|------|------|------|------|------|------|------|-------|-------|-------|------|
|                                                             |                   |           |        |            |           |           |           |                         |                      |     |      | 16                                              | 18   | 31   | 33   | 35   | 39   | 45   | 51   | 52   | 53   | 56   | 58   | 59   | 66   | 68   |       |       | 6     | 11   |
|                                                             | Mayaud 2003       | N         | C-S    | 23.4       | 15 to 44  | C         | MY9/11    | GBR                     | Norm                 | 542 | 31.5 | 5.7                                             | 4.1  | 1.1  | 3.1  | 0.2  | 0    | 0    | 1.1  | 0.4  | 0    | 0    | 0    | 0    | 0    | 0    | 0     | 0     | 11.1  | 8.5  |
|                                                             | Mayaud 2003       | N         | C-S    | 23.4       | 15 to 44  | C         | MY9/11    |                         | LSIL                 | 10  | 100  | 30                                              | 10   | 20   | 20   | 10   | 0    | 0    | 0    | 10   | 0    | 0    | 0    | 10   | 0    | 0    | 0     | 0     | 30    | 20   |
|                                                             | Mayaud 2003       | N         | C-S    | 23.4       | 15 to 44  | C         | MY9/11    |                         | HSIL                 | 9   | 100  | 11.1                                            | 11.1 | 11.1 | 22.2 | 11.1 | 0    | 0    | 11.1 | 0    | 0    | 0    | 0    | 0    | 0    | 0    | 0     | 0     | 44.4  | 22.2 |
|                                                             | Vidal 2011        | N         | C-S    | 40.3       |           | C         | PGMY9 /11 | USA                     | Norm                 | 148 | 13.5 | 2.7                                             | 2    | 0.7  | 0    | 0.7  | 0    | 2    | 1.4  | 0    | 0.7  | 0.7  | 4.1  | 0.7  | 2    | 0.7  | 0     | 0     | 7.4   | 13.5 |
|                                                             | Vidal 2011        | N         | C-S    | 35.7       |           | C         | PGMY9 /11 |                         | LSIL                 | 21  | 57.1 | 9.5                                             | 0    | 0    | 0    | 19   | 4.8  | 14.3 | 14.3 | 4.8  | 14.3 | 0    | 23.8 | 14.3 | 0    | 0    | 0     | 5.9   | 42.9  | 100  |
|                                                             | Vidal 2011        | N         | C-S    | 44.7       |           | C         | PGMY9 /11 |                         | HSIL                 | 17  | 82.4 | 17.6                                            | 17.6 | 11.8 | 11.8 | 11.8 | 0    | 5.9  | 5.9  | 11.8 | 29.4 | 0    | 5.9  | 0    | 11.8 | 5.9  | 5.9   | 0     | 147.1 | 76.5 |
|                                                             | Vidal 2011        | N         | C-S    | 55.2       |           | C         | PGMY9 /11 |                         | ICC                  | 48  | 68.8 | 60.4                                            | 14.6 | 12.5 | 6.3  | 27.1 | 0    | 22.9 | 0    | 10.4 | 0    | 0    | 4.2  | 0    | 0    | 0    | 22.9  | 15.8  | 16.7  | 58.3 |
| Uganda (5)<br>959 [3.6]<br>{Eastern Africa}<br>Low Income   | Blossom 2007      | Y         | C-S    | 26         | 18-51     | C         | PGMY9 /11 | USA                     | HSIL                 | 19  | 73.7 | 26.3                                            | 5.3  | 5.3  | 5.3  | 5.3  | 0    | 10.5 | 10.5 | 21.1 | 5.3  | 15.8 | 21.1 | 0    | 10.5 | 5.3  | 10.5  | 2.3   | 0     | 52.6 |
|                                                             | Bosch 1995e       | N         | C-S    | 34         |           | C         | PGMY9 /11 | USA                     | ICC                  | 43  | 93   | 53.5                                            | 16.3 | 0    |      |      | 0    | 4.7  |      |      |      |      | 0    |      |      | 0    | 0     | 0     |       |      |
|                                                             | Odida 2008        | N         | C-S    |            |           | C         | SPF       | NLD                     | ICC                  | 181 | 63   | 29.8                                            | 18.2 | 2.2  | 0    | 1.1  | 1.1  | 7.2  | 1.7  | 1.1  | 0    | 0    | 0    | 0    | 0    | 0    | 0     | 2.8   | 2.2   |      |
|                                                             | Odida 2010        | N         | C-S    |            |           | C         | SPF       | NLD                     | ICC                  | 171 | 90.1 | 42.7                                            | 17.5 | 0.6  | 1.8  | 3.5  | 1.2  | 8.8  | 1.8  | 1.2  | 0    | 0    | 0.6  | 0    | 3.5  |      | 0     | 0     | 3.5   | 6.4  |
|                                                             | Odida 2011        | Y/N       | C-S    | 41         | 18-74     | C         | SPF       | NLD                     | Norm                 | 309 | 30.7 | 3.2                                             | 2.6  | 1    | 1.6  | 2.3  | 0.3  | 0    | 2.6  | 4.2  | 1.3  | 1.3  | 1    | 0.6  | 1.6  |      | 1     | 0.8   | 12.9  | 6.5  |
|                                                             | Odida 2011        | Y/N       | C-S    | 47         | 18-74     | C         | SPF       |                         | ICC                  | 236 | 89.8 | 47                                              | 20.8 | 1.3  | 1.7  | 4.2  | 1.3  | 9.3  | 1.7  | 2.5  | 0    | 0.8  | 0.8  | 0.4  | 0    | 0    | 0.8   | 0     | 6.4   | 8.1  |
| Zaire (DRC)(1)<br>10 [0.0]<br>{Middle Africa}<br>Low Income | Icenogle 1992     | Y         | C-S    |            |           | C         | GP5/6     | USA                     | LSIL                 | 8   | 75   | 12.5                                            | 12.5 | 12.5 | 12.5 | 0    |      |      |      |      |      |      |      |      |      |      |       |       | 25    | 62.5 |
|                                                             | Icenogle 1992     | Y         | C-S    |            |           | C         | MY9/11    |                         | HSIL                 | 2   | 100  | 100                                             | 0    | 0    | 0    | 0    |      |      |      |      |      |      |      |      |      |      |       | 0     | 50    |      |
| Zambia (2)<br>218 [0.8]<br>{Eastern Africa}<br>Low Income   | Ng'andwe 2007     | Y/N       | C-S    | 22         | 15-38     | C/H       | MY9/11    | USA                     | Norm                 | 70  | 65.7 | 15.7                                            | 15.7 | 0    | 2.9  | 2.9  | 0    | 1.4  | 1.4  | 0    | 0    | 0    | 2.9  | 0    |      | 0    | 5.7   | 0     | 7.1   | 0    |
|                                                             | Sahasrabudde 2007 | Y         | C-S    | 36.2       | 23-49     | C         | PGMY9 /11 | USA                     | Norm                 | 10  | 80   | 0                                               | 20   | 0    | 0    | 20   | 10   | 0    | 0    | 20   | 10   | 10   | 10   | 0    | 0    | 10   | 0     | 3.8   | 130   | 30   |
|                                                             | Sahasrabudde 2007 | Y         | C-S    | 36.2       | 23-49     | C         | PGMY9 /11 |                         | ASC                  | 26  | 96.2 | 23.1                                            | 11.5 | 7.7  | 0    | 15.4 | 11.5 | 11.5 | 7.7  | 30.8 | 23.1 | 3.8  | 7.7  | 3.8  | 7.7  | 11.5 | 0     | 0     | 176.9 | 65.4 |
|                                                             | Sahasrabudde 2007 | Y         | C-S    | 36.2       | 23-49     | C         | PGMY9 /11 |                         | LSIL                 | 35  | 97.1 | 5.7                                             | 11.4 | 8.6  | 11.4 | 17.1 | 11.4 | 17.1 | 14.3 | 40   | 17.1 | 17.1 | 20   | 17.1 | 28.6 | 14.3 | 8.6   | 0     | 234.3 | 91.4 |
|                                                             | Sahasrabudde 2007 | Y         | C-S    | 36.2       | 23-49     | C         | PGMY9 /11 |                         | HSIL                 | 49  | 100  | 14.3                                            | 10.2 | 20.4 | 8.2  | 12.2 | 16.3 | 24.5 | 18.4 | 38.8 | 20.4 | 14.3 | 30.6 | 0    | 12.2 | 14.3 | 0     | 0     | 12.2  | 100  |
|                                                             | Sahasrabudde 2007 | Y         | C-S    | 36.2       | 23-49     | C         | PGMY9 /11 |                         | ICC                  | 28  | 100  | 35.7                                            | 17.9 | 21.4 | 14.3 | 28.6 | 10.7 | 17.9 | 21.4 | 46.4 | 25   | 14.3 | 35.7 | 14.3 | 10.7 | 14.3 | 0     | 0     | 14.3  | 78.6 |
| Zimbabwe (3)<br>564 [2.1]<br>{Eastern Africa}<br>Low Income | Gravitt 2002      | N         | C-C    | 32         | 25-55     | C         | MY9/11    | USA                     | Norm                 | 213 | 30   | 4.7                                             | 4.7  | 0.5  | 3.3  | 0.5  | 1.9  | 1.4  | 5.2  | 6.6  | 4.2  | 3.3  | 3.8  | 0    | 2.8  | 1.9  | 2.3   | 1     | 7.5   | 16   |
|                                                             | Gravitt 2002      | N         | C-C    | 32         | 25-55     | C         | MY9/11    |                         | HSIL                 | 210 | 77.1 | 30.5                                            | 20.5 | 12.9 | 14.8 | 10   | 5.2  | 5.7  | 11.4 | 19   | 16.2 | 8.6  | 21.9 | 5.2  | 6.7  | 6.7  | 6.2   | 14    | 32.4  | 52.4 |
|                                                             | Stanczuk 2003a    | N         | C-S    | 44         | 24-70     | H         | IH        | ZAF                     | ICC                  | 43  | 97.7 | 58.1                                            | 14   | 2.3  | 27.9 | 0    | 0    | 0    | 0    | 0    | 0    | 0    | 2.3  | 0    |      |      |       | 0     | 14    |      |
|                                                             | Stanczuk 2003b    | N         | C-S    | 46         | 22-77     | H         | IH        |                         | ICC                  | 98  | 100  | 62.2                                            | 19.4 | 4.1  | 39.8 | 1    | 0    | 0    | 0    | 0    | 0    | 0    | 1    | 0    | 0    | 0    | 0     | 0     | 0     | 25.5 |
| Mixed 4 (1)<br>155 [0.7]<br>{Eastern and                    | Dols 2012         | Y         | C-S    |            | >18       | C         | SPF       |                         | Norm                 | 138 | 42   | 13                                              | 4.3  | 3.6  | 8    | 4.3  | 2.2  | 0.7  | 7.2  | 12.3 | 0    | 2.2  | 2.2  | 0    | 5.1  | 1.4  |       | 0     |       |      |
|                                                             | Dols 2012         | Y         | C-S    |            | >18       | C         | SPF       |                         | HSIL                 | 17  | 94.1 | 29.4                                            | 11.8 | 0    | 5.9  | 23.5 | 11.8 | 0    | 11.8 | 41.2 | 0    | 0    | 0    | 0    | 11.8 | 11.8 |       |       | 0     |      |

| Country (S)<br>N [%]<br>{Region}<br>GNI                                      | Study         | HIV (Y/N) | Design | Median Age | Age range | Pathology | Primer | HPV genotyping location | Cervical Lesion/Norm | N   | Any  | HPV-specific prevalence (% of all cases tested) |      |     |     |     |     |    |     |      |    |     |      |     |      | Other | Multi |    |   |     |      |
|------------------------------------------------------------------------------|---------------|-----------|--------|------------|-----------|-----------|--------|-------------------------|----------------------|-----|------|-------------------------------------------------|------|-----|-----|-----|-----|----|-----|------|----|-----|------|-----|------|-------|-------|----|---|-----|------|
|                                                                              |               |           |        |            |           |           |        |                         |                      |     |      | 16                                              | 18   | 31  | 33  | 35  | 39  | 45 | 51  | 52   | 53 | 56  | 58   | 59  | 66   |       |       | 68 | 6 | 11  |      |
| Southern Africa<br>Mixed Economies                                           | Dols 2012     | Y         | C-S    | .          | >18       | C         | SPF    |                         | UNS                  | 39  | 89.7 | 38.5                                            | 2.6  | 5.1 | 7.7 | 7.7 | 2.6 | 0  | 7.7 | 23.1 | 0  | 7.7 | 20.5 | 2.6 | 33.3 | 5.1   | .     | .  | 0 | .   |      |
| Mixed 5 (1)<br>468 [0.9]<br>{Eastern and Southern Africa}<br>Mixed Economies | De Vuyst 2011 | Y         | C-C    | 43.2       |           | H         | GP5/6  |                         | ICC                  | 235 | 95.7 | 50.2                                            | 15.7 | 1.3 | 2.6 | 7.2 | 0.9 | 14 | 0.4 | 1.7  | 0  | 2.1 | 3    | 0.4 | 0    | 2.1   | 0     | 0  | 0 | 0.9 | 11.1 |

**Abbreviations Used:**

**Design:** C-S: Cross sectional; C-C: case control

**Pathology reading:** C- Cytology; H -Histology

**Primer:** PYGMY9/11; GP5/6; MY9/11; SPF10; IH: in house primer;

**Location of HPV genotype:** USA: United States of America; NLD: Netherlands; ITA: Italy; ZAF: South Africa; FRA: France; ESP: Spain; ETH: Ethiopia; GBR: United Kingdom; SWE: Sweden; BEL: Belgium; JPN: Japan; N.S.: Not stated; MAR: Morocco; SDN: Sudan; DNK: Denmark;

**Cervical Lesion / Norm:** ICC: invasive cervical carcinoma; ASC: atypical squamous cells of undetermined significance; LSIL: low-grade squamous intraepithelial lesion; HSIL: high-grade squamous intraepithelial lesion; Norm: Normal; ASC+: women who reported ASCUS or higher lesions without specifying the exact lesion type; HSIL+: women who reported HSIL or higher lesions without specifying whether it is HSIL or ICC; UNS: Unspecified low lesion type.
